# Supplementary material for: Transmembrane and Tetratricopeptide Repeat Containing 4 Is a Novel Diagnostic Marker for Prostate Cancer with High Specificity and Sensitivity
Source: MDPI journal article supplement (doi:10.3390/cells10051029), 2021-04-27

## Supplementary Materials

### **Transmembrane and tetratricopeptide repeat containing 4 is a novel diagnostic marker for prostate cancer with high specificity and sensitivity**

Rania Makboul<sup>1</sup>, Islam F. Abdelkawi<sup>2</sup>, Dalia M. Badary<sup>1</sup>, Mahmoud R.A. Hussein<sup>1</sup>, John S. Rhim<sup>3</sup>, Eman A. Toraih<sup>4</sup>, Mourad Zerfaoui<sup>4</sup>, Zakaria Y. Abd Elmageed<sup>5#</sup>

Departments of Pathology<sup>1</sup> and Urology<sup>2</sup>, Faculty of Medicine, Assiut University, Assiut 71111, Egypt;

Department of Surgery<sup>3</sup>, Uniformed Services University of the Health Sciences, Bethesda, MD 20814;

Department of Surgery<sup>4</sup>, Tulane University School of Medicine, 1430 Tulane Avenue, New Orleans, LA 70112;

Department of Pharmacology<sup>5</sup>, Edward Via College of Osteopathic Medicine, University of Louisiana at Monroe, Monroe, LA 71203, USA

**Figure S1. Expression of TMTC4 in a large panel of PCa cells.** Protein cell lysates were collected from C4-2B, Du-145, PC-3, E006AA, RC77 T/E, E006A-hT, RC77 N/E, RWPE-1 and BPH1 cells and the expression of cellular TMTC4 was evaluated by Western blot analysis. Membranes were incubated with TMTC4 primary antibody and GAPDH was used as a loading protein.

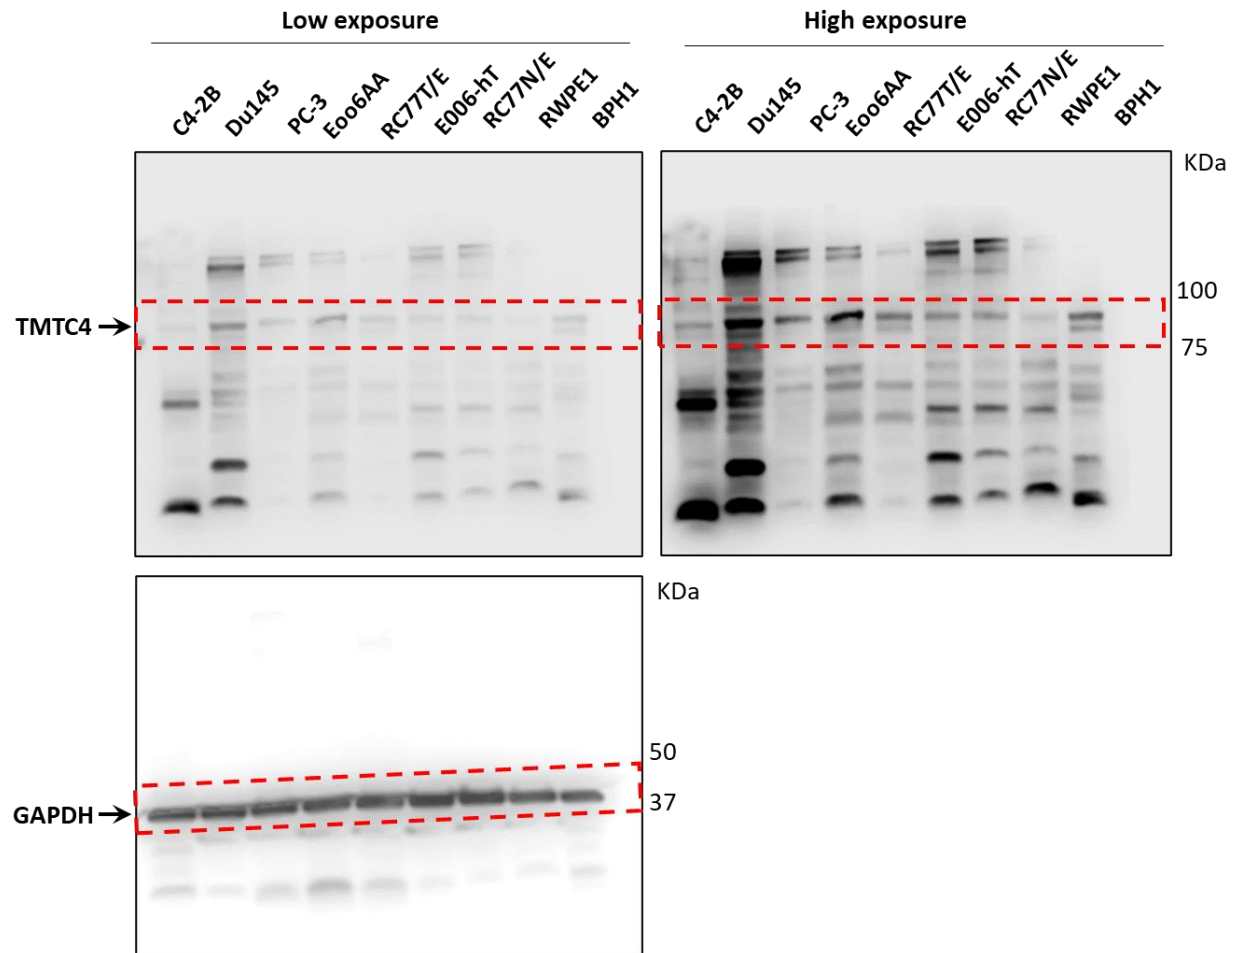

Supplement: s1 [file s1]
